# Supplementary material for: Integrative pan-cancer analysis reveals the prognostic and immunotherapeutic value of ALKBH7 in HNSC
Source: publisher site journal article supplement (doi:10.18632/aging.205981), 2024-06-29
Supplement: Supplementary file [file aging-v16-205981-supplementary-material-SD1.pdf]

**SUPPLEMENTARY FIGURES**

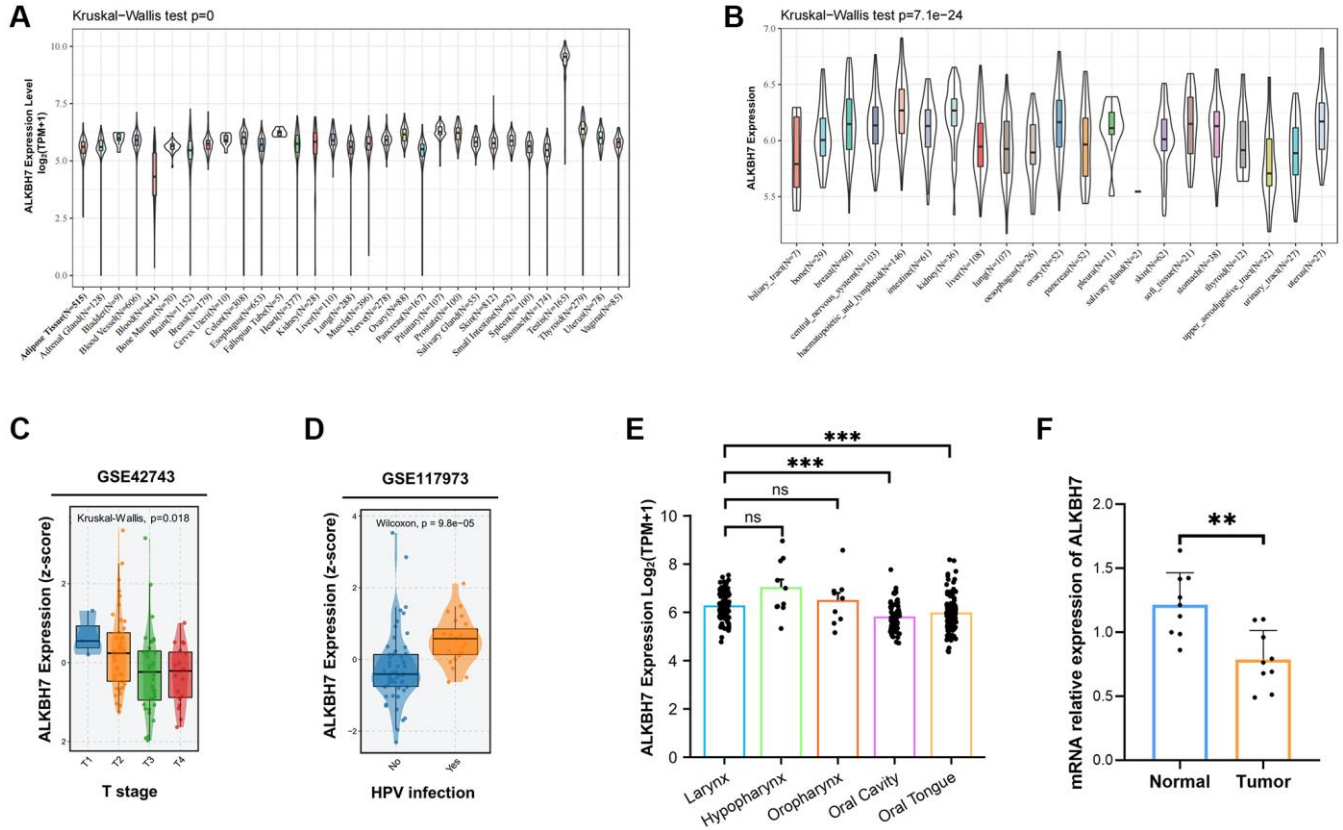

**Supplementary Figure 1. Expression levels of ALKBH7 according to various data sources. (A)** ALKBH7 expression in 31 regular tissues and **(B)** in 21 regular tumor cells. **(C)** The expression level of ALKBH7 in different clinical stages of HNSC. **(D)** The expression level of ALKBH7 in different HPV infection status of HNSC. **(E)** The expression level of ALKBH7 in different anatomic neoplasm subdivision. **(F)** The mRNA relative expression level of ALKBH7 in tumor tissue and adjacent normal tissue from HNSC patients. \* $p < 0.05$ , \*\* $p < 0.01$ .

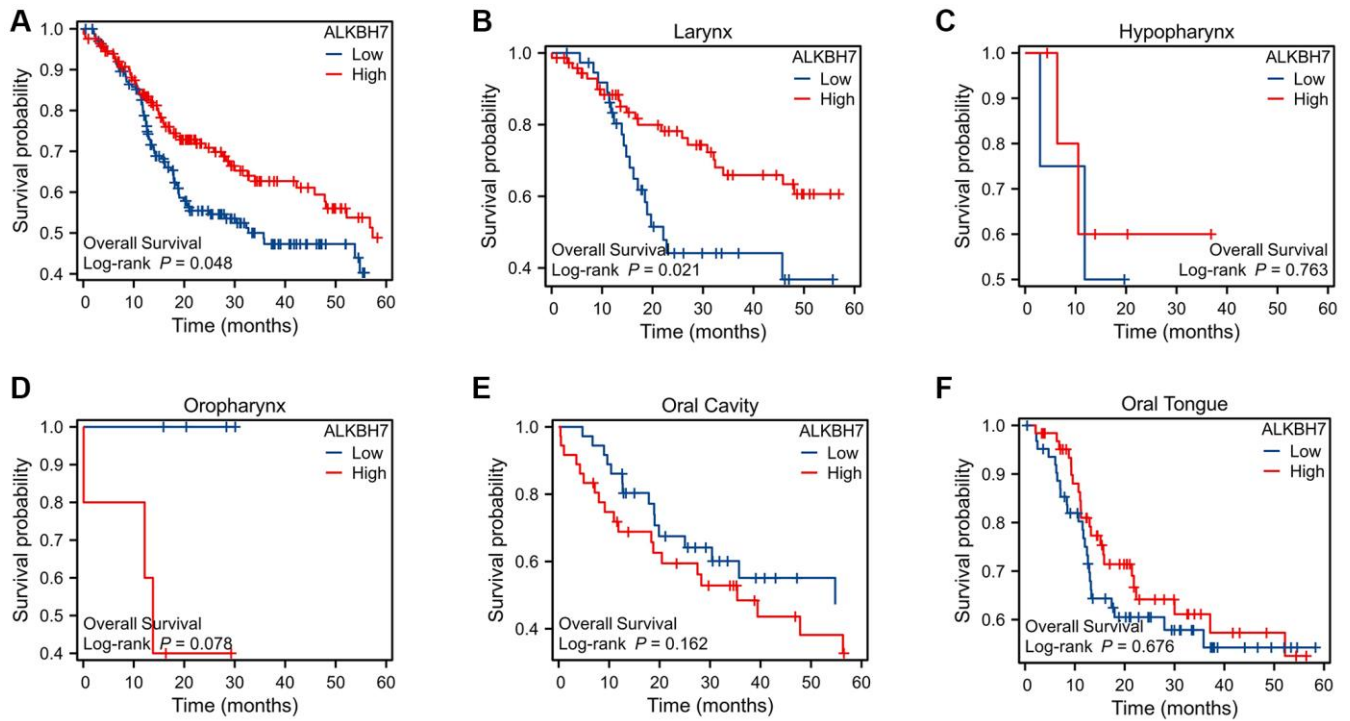

**Supplementary Figure 2. Effect of ALKBH7 expression on prognosis in HNSC.** (A) Correlation between ALKBH7 expression and OS in HNSC patients. (B) Correlation between ALKBH7 expression and OS in patients with squamous carcinoma of larynx. (C) Correlation between ALKBH7 expression and OS in patients with squamous carcinoma of hypopharynx. (D) Correlation between ALKBH7 expression and OS in patients with squamous carcinoma of oropharynx. (E) Correlation between ALKBH7 expression and OS in patients with squamous carcinoma of oral cavity. (F) Correlation between ALKBH7 expression and OS in patients with squamous carcinoma of oral tongue.

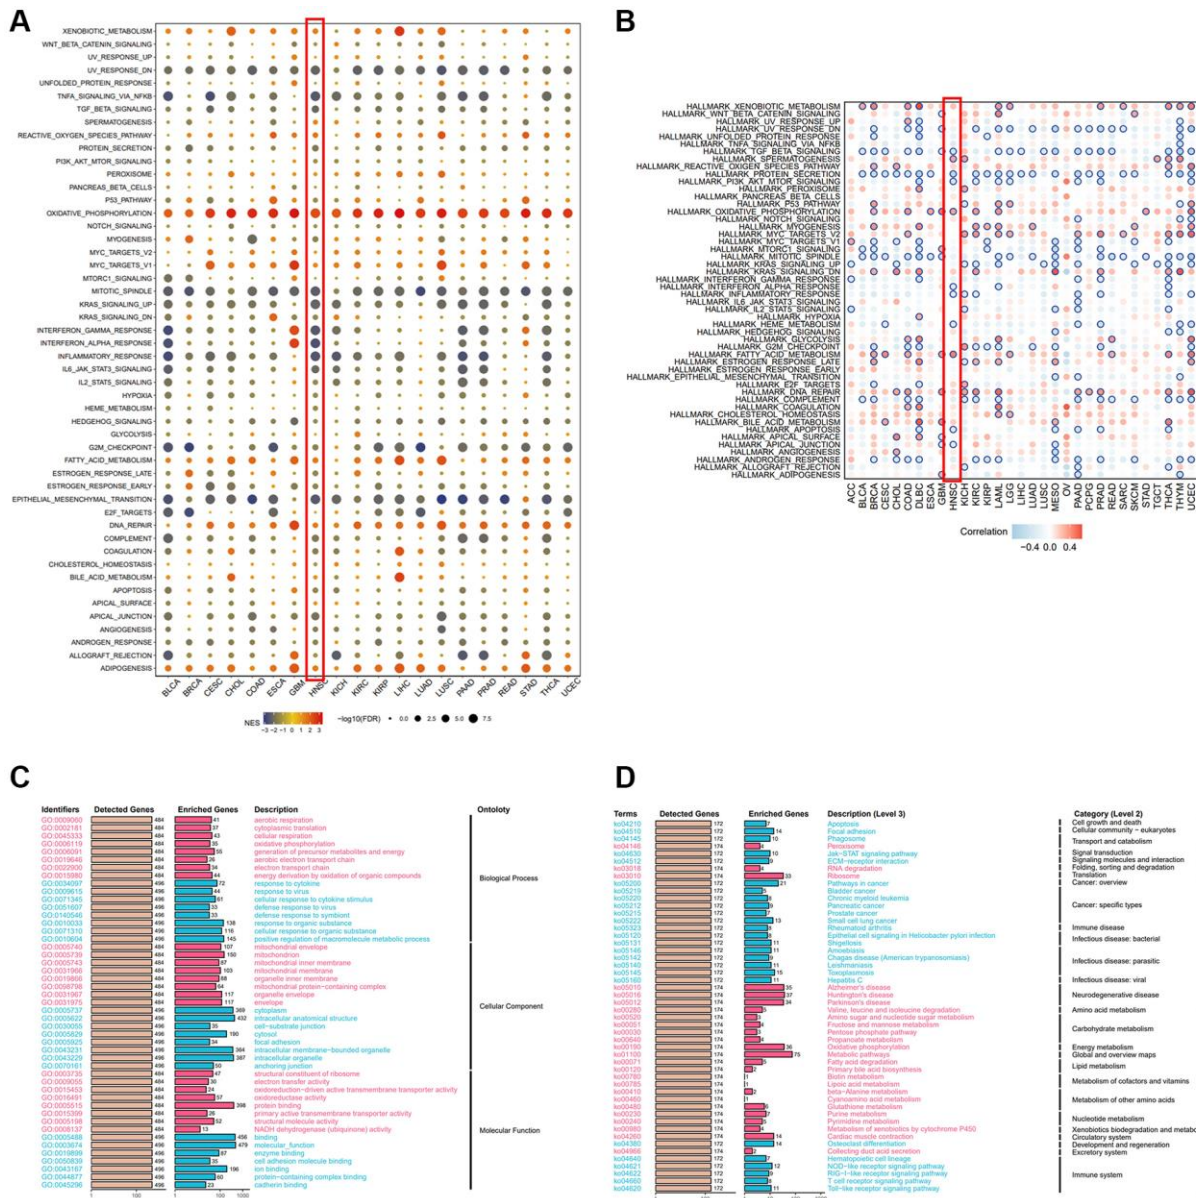

**Supplementary Figure 3. Enrichment analysis and visualization of ALKBH7-related partners based on TCGA dataset. (A, B)** GSEA regarding enrichment score group (A) and GSVA (B) of ALKBH7-related signaling pathways in pan-cancer. (C, D) Over-representation analysis of ALKBH7-related biological functions using the GO (C) and KEGG (D) datasets in HNSC. Up-regulated terms appeared in red and down-regulated terms appeared in blue.



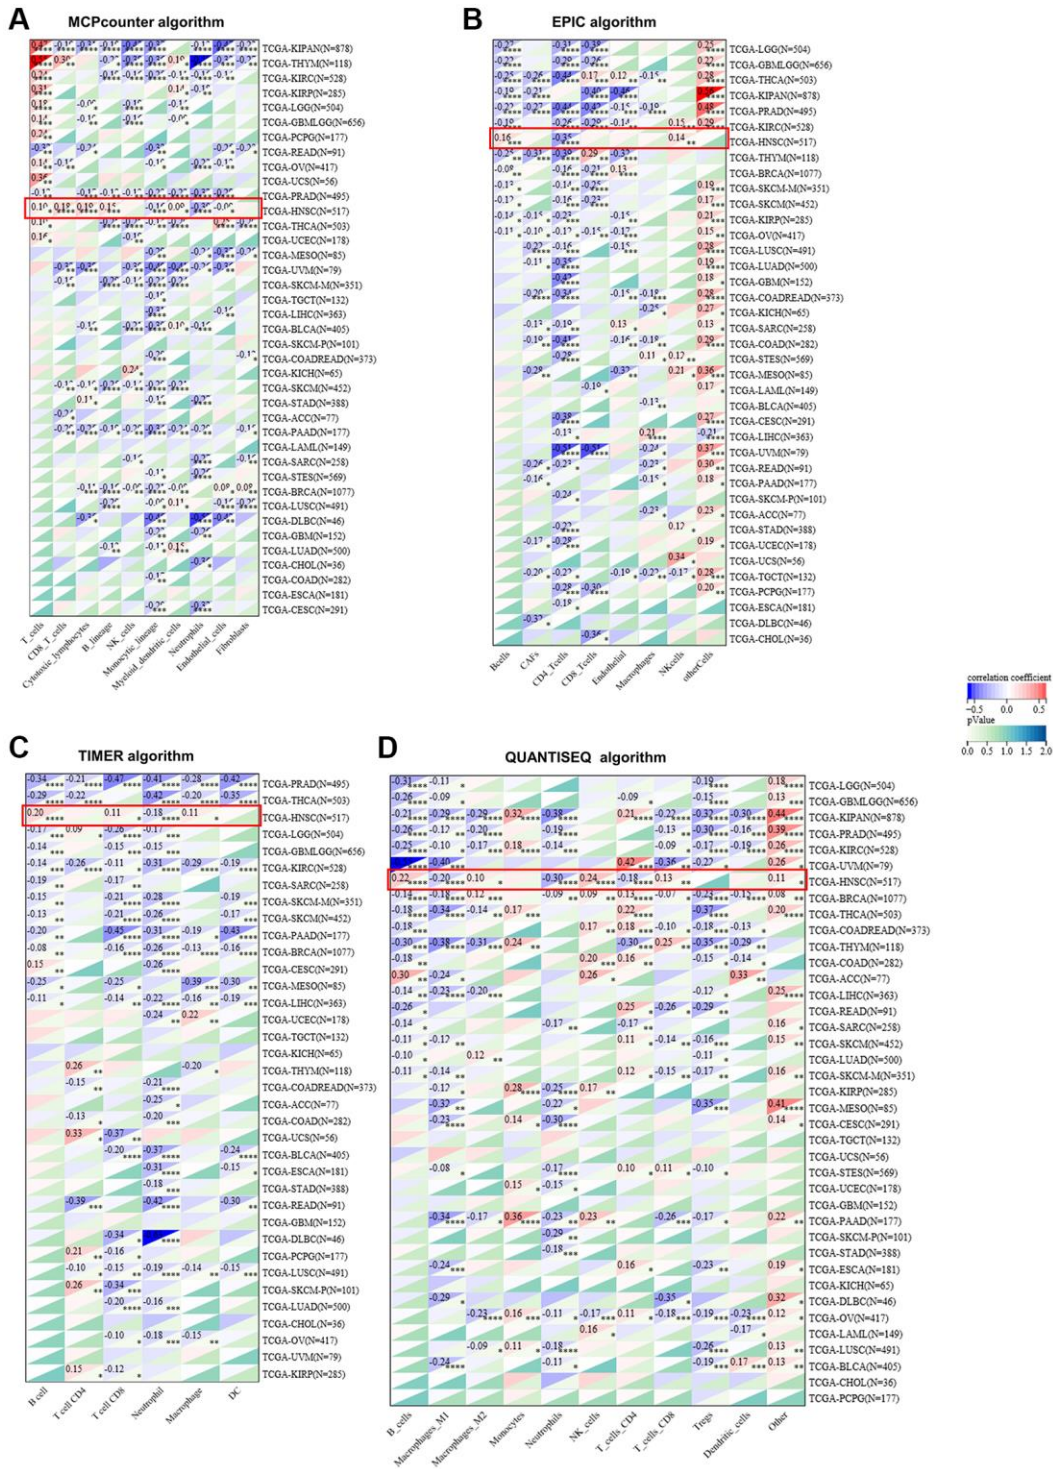

**Supplementary Figure 4.** Correlation between ALKBH7 expression and immune cells infiltration based on different data algorithms ((A) MCPcounter, (B) EPIC, (C) TIMER and (D) QUANTISEQ). \* $p < 0.05$ , \*\* $p < 0.01$ , \*\*\* $p < 0.001$ , \*\*\*\* $p < 0.0001$ .
