# Supplementary material for: Integrative pan-cancer analysis reveals the prognostic and immunotherapeutic value of ALKBH7 in HNSC
Source: publisher site journal article supplement (doi:10.18632/aging.205981), 2024-06-29
Supplement: Supplementary file [file aging-v16-205981-supplementary-material-SD2.pdf]

## SUPPLEMENTARY TABLES

**Supplementary Table 1. Clinical characteristics of high and low expression of ALKBH7 in HNSC patients.**

| Characteristics                       | Low expression of ALKBH7 | High expression of ALKBH7 | P-value |
|---------------------------------------|--------------------------|---------------------------|---------|
| <i>n</i>                              | 143                      | 133                       |         |
| Gender, <i>n</i> (%)                  |                          |                           | 0.005   |
| Female                                | 51 (18.5%)               | 27 (9.8%)                 |         |
| Male                                  | 92 (33.3%)               | 106 (38.4%)               |         |
| Age, median (IQR)                     | 61 (53.5, 69)            | 61 (56,67)                | 0.732   |
| Smoker, <i>n</i> (%)                  |                          |                           | 0.144   |
| No                                    | 41 (14.9%)               | 28 (10.1%)                |         |
| Yes                                   | 102 (37%)                | 105 (38%)                 |         |
| Alcohol history, <i>n</i> (%)         |                          |                           | 0.892   |
| No                                    | 43 (15.6%)               | 39 (14.1%)                |         |
| Yes                                   | 100 (36.2%)              | 94 (34.1%)                |         |
| Radiation therapy, <i>n</i> (%)       |                          |                           | 0.002   |
| No                                    | 60 (21.7%)               | 32 (11.6%)                |         |
| Yes                                   | 83 (30.1%)               | 101 (36.6%)               |         |
| Lymphovascular invasion, <i>n</i> (%) |                          |                           | 0.002   |
| No                                    | 106 (38.4%)              | 75 (27.2%)                |         |
| Yes                                   | 37 (13.4%)               | 58 (21%)                  |         |
| Primary therapy outcome, <i>n</i> (%) |                          |                           | 0.544   |
| CR                                    | 129 (46.7%)              | 114 (41.3%)               |         |
| PR                                    | 0 (0%)                   | 1 (0.4%)                  |         |
| SD                                    | 2 (0.7%)                 | 2 (0.7%)                  |         |
| PD                                    | 12 (4.3%)                | 16 (5.8%)                 |         |

**Supplementary Table 2. Summary of cancer types.**

| Cancer abbreviation | Cancer type                                                      |
|---------------------|------------------------------------------------------------------|
| ACC                 | Adrenocortical carcinoma                                         |
| BLCA                | Bladder urothelial carcinoma                                     |
| BRCA                | Breast invasive carcinoma                                        |
| CESC                | Cervical squamous cell carcinoma and endocervical adenocarcinoma |
| CHOL                | Cholangiocarcinoma                                               |
| COAD                | Colon adenocarcinoma                                             |
| DLBC                | Lymphoid neoplasm diffuse large B-celllymphoma                   |
| ESCA                | Esophageal carcinoma                                             |
| GBM                 | Glioblastoma multiforme                                          |
| HNSC                | Head and Neck squamous cell carcinoma                            |
| KICH                | Kidney chromophobe                                               |
| KIRC                | Kidney renal clear cell carcinoma                                |
| KIRP                | Kidney renal papillary cell carcinoma                            |
| LAML                | Acute myeloid leukemia                                           |
| LGG                 | Brain lower grade glioma                                         |
| LIHC                | Liver hepatocellular carcinoma                                   |
| LUAD                | Lung adenocarcinoma                                              |
| LUSC                | Lung squamous cell carcinoma                                     |

|      |                                      |
|------|--------------------------------------|
| MESO | Mesothelioma                         |
| OV   | Ovarian serous cystadenocarcinoma    |
| PAAD | Pancreatic adenocarcinoma            |
| PCPG | Pheochromocytoma and Paraganglioma   |
| PRAD | Prostate adenocarcinoma              |
| READ | Rectum adenocarcinoma                |
| SARC | Sarcoma                              |
| SKCM | Skin cutaneous melanoma              |
| STAD | Stomach adenocarcinoma               |
| TGCT | Testicular germ cell tumors          |
| THCA | Thyroid carcinoma                    |
| THYM | Thymoma                              |
| UCEC | Uterine corpus endometrial carcinoma |
| UCS  | Uterine carcinosarcoma               |
| UVM  | Uveal melanoma                       |

---
